# Supplementary material for: Sequential and click-type postfunctionalization of regioregular poly(3-hexylthiophene) for realization of n-doped multiplet state
Source: Royal Society of Chemistry journal article supplement (doi:10.1039/c2sc21334f), 2012-09-12
Supplement: c2sc21334f.pdf [file c2sc21334f.pdf]

**Supplementary Material (ESI) for *Chem. Sci.***

**This journal is © The Royal Society of Chemistry**

**Sequential and click-type postfunctionalization of regioregular poly(3-hexylthiophene) for realization of n-doped multiplet state**

Yuping Yuan,<sup>a</sup> Wonsung Choi,<sup>b</sup> Hiroyuki Nishide<sup>b</sup> and Tsuyoshi Michinobu<sup>\*,c</sup>

<sup>a</sup>*Department of Organic and Polymeric Materials, Tokyo Institute of Technology, 2-12-1 Ookayama, Meguro-ku, Tokyo 152-8552, Japan*

<sup>b</sup>*Department of Applied Chemistry, Waseda University, Tokyo 169-8555, Japan*

<sup>c</sup>*Global Edge Institute, Tokyo Institute of Technology, 2-12-1 Ookayama, Meguro-ku, Tokyo 152-8550, Japan*

\*Correspondence Address:

Dr. Tsuyoshi Michinobu

Global Edge Institute, Tokyo Institute of Technology

2-12-1 Ookayama, Meguro-ku, Tokyo 152-8550, Japan

Tel/Fax: +81-3-5734-3774, E-mail: michinobu.t.aa@m.titech.ac.jp

## 1. Materials

All reagents were purchased from Kanto, Tokyo Kasei, Wako, and Aldrich and used as received. Poly(3-hexylthiophene)<sup>S1</sup> with the molecular weight ( $M_n$ ) of 9600 and polydispersity ( $M_w/M_n$ ) of 1.59 and *N,N*-dihexyl-4-[(tributylstannanyl)ethynyl]aniline<sup>S2</sup> were synthesized according to the reported methods.

## 2. Measurements

<sup>1</sup>H NMR spectra were measured on a JEOL model AL300 spectrometer at 20 °C. Chemical shifts are reported in ppm downfield from SiMe<sub>4</sub> using the solvent's residual signal as an internal reference. Infrared (IR) spectra were recorded on a JASCO FT/IR-4100 spectrometer. Gel permeation chromatography (GPC) was measured on a JASCO system equipped with polystyrene gel columns using THF as an eluent at the flow rate of 1.0 mL min<sup>-1</sup>. Relative molecular weights were determined by comparison with the calibrated standard polystyrenes. Elemental analysis was performed on a PerkinElmer 2400-SeriesII CHNS/O Analyzer. UV-vis-near IR spectra were recorded on a JASCO V-670 spectrophotometer. Electrochemical measurements were carried out at 20 °C in dehydrated CH<sub>3</sub>CN or CH<sub>2</sub>Cl<sub>2</sub> containing 0.1 M (*n*C<sub>4</sub>H<sub>9</sub>)<sub>4</sub>NClO<sub>4</sub> in a classical three-electrode cell. The working, reference, and auxiliary electrodes were a glassy carbon disk electrode (2 mm in diameter), Ag/AgCl/CH<sub>3</sub>CN/(*n*C<sub>4</sub>H<sub>9</sub>)<sub>4</sub>NClO<sub>4</sub>, and a platinum wire, respectively. All potentials are referenced to the ferrocene/ferricinium (Fc/Fc<sup>+</sup>) couple used as an internal standard. ESR spectra were recorded on a JEOL JES-2XG ESR spectrometer. The signal positions were calibrated with an external standard of Mg<sup>2+</sup>/MgO ( $g = 1.981$ ). Electrolytic ESR measurements were performed by the

stepwise application of negative voltages to the sample solutions in degassed  $\text{CH}_2\text{Cl}_2$  (2.9 mM repeat unit<sup>-1</sup>) containing 0.1 M  $(n\text{C}_4\text{H}_9)_4\text{NClO}_4$  at 20 °C.

Magnetization and static magnetic susceptibility were measured with a Quantum Design MPMS-7 SQUID magnetometer (Quantum Design Inc., San Diego, CA, USA). After chemical reduction, the solution samples of poly(anionic radical)s were transferred to a quartz tube in a glove box. The tube was sealed off and then subjected to magnetic measurements. Magnetization was measured from 0.5 to 7 T at 1.8 K in order to estimate the saturated magnetization. Static magnetic susceptibility was measured from 2 to 50 K at a field of 0.5 T. Ferromagnetic magnetization ascribed to the impurities was determined by Honda-Owen plots. Although the quantity was very low, it was subtracted from the overall magnetization. Diamagnetic susceptibility of the sample solution and a part of the tube was estimated from the Curie plots of magnetic susceptibility.

### 3. Synthetic procedures

**P1.** To P3HT (0.300 g, 1.81 mmol repeat unit<sup>-1</sup>) in  $\text{CHCl}_3$  (20 mL), *N*-bromosuccinimide (NBS) (0.387 g, 2.17 mmol) was added. After the solution was stirred at 20 °C for 15 h, it was heated to 50 °C for 2 h. The reaction mixture was poured into a saturated aqueous  $\text{NaHCO}_3$  solution (50 mL). The organic layer was washed with water (×5) and dried over  $\text{MgSO}_4$ . Precipitation into MeOH yielded the yellow solid of poly(3-bromo-4-hexylthiophene) (0.440 g, 99%). The analytical data agreed with the reported values.<sup>S3</sup>

To a 30 mL two-necked flask, poly(3-bromo-4-hexylthiophene) (0.196 g, 0.800 mmol) and *N,N*-dihexyl-4-[(tributylstannanyl)ethynyl]aniline (0.689 g, 1.20 mmol)

were added, and they were dissolved in dehydrated toluene (20 mL). The solution was bubbled with argon for 30 min, and Pd(PPh<sub>3</sub>)<sub>4</sub> (37 mg, 0.032 mmol) was added. The reaction mixture was heated to 100 °C for 24 h. After cooling to room temperature, CHCl<sub>3</sub> was added and the solution was passed through a plug. The solution was concentrated by evaporation and poured into cold MeOH. Reprecipitation from CHCl<sub>3</sub> into cold MeOH was performed. The brown solid was collected and washed with MeOH using a Soxhlet extractor. Drying under vacuum yielded the desired polymer (352 mg, 98%).

$M_n$  23600,  $M_w/M_n$  1.66; <sup>1</sup>H NMR (300 MHz, CDCl<sub>3</sub>, δ): 0.87 (br s, 9 H), 1.29 (br s, 18 H), 1.57 (br s, 6 H), 3.25 (br s, 6 H), 6.53 (br s, 2 H), 7.30 ppm (br s, 2 H); IR (neat): 2955.2, 2924.2, 2853.8, 2195.9, 1605.3, 1518.7, 1464.0, 1398.6, 1368.0, 1184.6, 1106.2, 963.7, 812.4, 723.1, 530.2 cm<sup>-1</sup>; Elemental analysis calcd for (C<sub>30</sub>H<sub>43</sub>NS)<sub>n</sub>: C 80.1, H 9.6, N 3.1; found: C 79.5, H 9.9, N 3.2.

**P2.** To a 50 mL flask, **P1** (94.6 mg, 0.213 mmol repeat unit<sup>-1</sup>) and tetracyanoethylene (TCNE) (27.2 mg, 0.213 mmol) were added, and they were dissolved in 1,2-dichloroethane (30 mL). The solution was heated to 60 °C for 6 h. After cooling to room temperature, the reaction mixture was poured into MeOH. Reprecipitation from 1,2-dichloroethane into MeOH was performed. The precipitate was collected and washed with MeOH using a Soxhlet extractor. Drying under vacuum yielded the desired polymer (117.5 mg, 96.5%).

<sup>1</sup>H NMR (300 MHz, CDCl<sub>3</sub>, δ): 0.88 (br s, 9 H), 1.31 (br s, 18 H), 1.59 (br s, 6 H), 3.36 (br s, 6 H), 6.65 (br s, 2 H), 7.45 ppm (br s, 2 H); IR (neat): 2953.2, 2928.4, 2856.0,

2209.0, 1600.1, 1465.2, 1412.0, 1362.5, 1181.4, 965.0, 823.0, 723.7, 578.7, 530.3  $\text{cm}^{-1}$ ;

Elemental analysis calcd for  $(\text{C}_{36}\text{H}_{43}\text{N}_5\text{S})_n$ : C 74.8, H 7.5, N 12.1; found: C 74.3, H 7.8,  
N 12.5.

#### 4. Electrochemistry

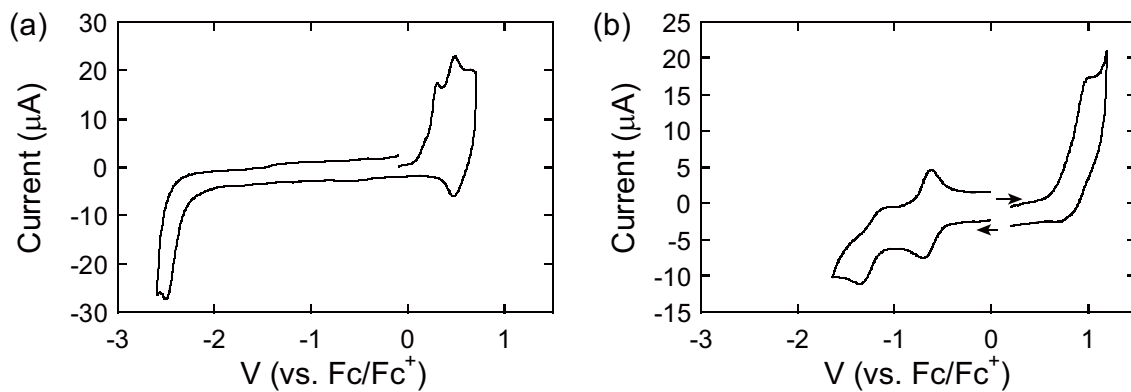

**Fig. S1** Cyclic voltammograms of the films of (a) **P1** and (b) **P2** in CH<sub>3</sub>CN containing 0.1 M (nC<sub>4</sub>H<sub>9</sub>)<sub>4</sub>NClO<sub>4</sub> at 20 °C.

#### 5. n-Doping

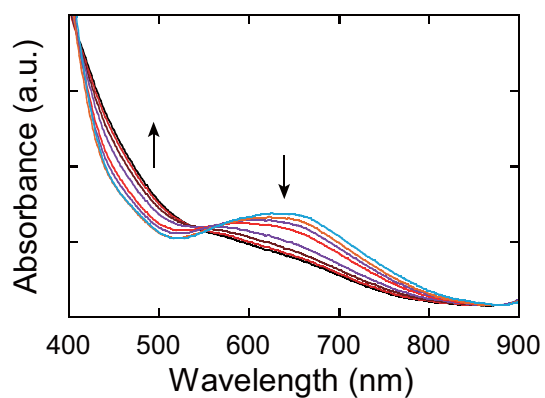

**Fig. S2** UV-vis-near IR spectra of **P2** in THF upon the stepwise addition of dekamethylcobaltocene under nitrogen.

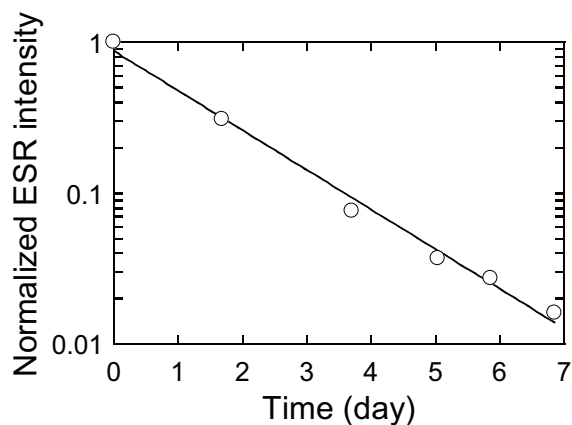

**Fig. S3** Time dependent ESR intensity decrease in the polyradical of **P2** in Ar atmosphere at 20 °C.

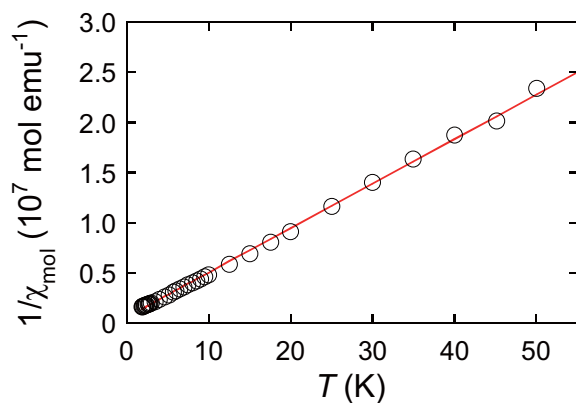

**Fig. S4** Plots of  $1/\chi_{\text{mol}}$  vs.  $T$  of the polyradical of **P2** with the spin concentration of 0.17 in THF.

## References

- S1) R. D. McCullough and R. S. Lowe, *J. Chem. Soc., Chem. Commun.*, 1992, 70.
- S2) B. Traber, J. J. Wolff, F. Rominger, T. Oeser, R. Gleiter, M. Goebel and R. Wortmann, *Chem. Eur. J.*, 2004, **10**, 1227.
- S3) Y. Li, G. Vamvounis and S. Holdcroft, *Macromolecules*, 2001, **34**, 141.
